# Supplementary material for: Sensitivity and specificity of early screening for autism
Source: PubMed Central journal article supplement — BJPsych Open. 2019 May 17;5(3):e41. doi: 10.1192/bjo.2019.34 (PMC6537444; doi:10.1192/bjo.2019.34), 2019-05-17
Supplement: S2056472419000346sup001.pdf [file S2056472419000346sup001.pdf]

**Supplementary table 1. Socio-demographic differences in screening participation and ASD risk**

|                               | Total<br>(n=100 364) | Returned 36-month<br>questionnaire (n=58 520) |         | ASD diagnosis<br>(n=697) |         |
|-------------------------------|----------------------|-----------------------------------------------|---------|--------------------------|---------|
|                               | n                    | n                                             | Percent | n                        | Percent |
| <b>Maternal education</b>     |                      |                                               |         |                          |         |
| <12 years                     | 7143                 | 3130                                          | 43.8 %  | 88                       | 1.23 %  |
| 12 years (high school level)  | 25 563               | 14 141                                        | 55.3 %  | 207                      | 0.81 %  |
| 13-16 years (college level)   | 38 983               | 24 794                                        | 63.6 %  | 232                      | 0.60 %  |
| ≥17 years (master/PhD level)  | 22 861               | 14 886                                        | 65.1 %  | 121                      | 0.53 %  |
| Missing information           | 5814                 | 1569                                          | 27.0 %  | 49                       | 0.84 %  |
| <b>Paternal education</b>     |                      |                                               |         |                          |         |
| <12 years                     | 9562                 | 5061                                          | 52.9 %  | 92                       | 0.96 %  |
| 12 years (high school level)  | 33 858               | 19 779                                        | 58.4 %  | 252                      | 0.74 %  |
| 13-16 years (college level)   | 25 259               | 16 027                                        | 63.5 %  | 159                      | 0.63 %  |
| ≥17 years (master/PhD level)  | 21 861               | 13 885                                        | 63.5 %  | 115                      | 0.53 %  |
| Missing information           | 9824                 | 3768                                          | 38.4 %  | 79                       | 0.80 %  |
| <b>Maternal age</b>           |                      |                                               |         |                          |         |
| <25 years                     | 11 129               | 5303                                          | 47.7 %  | 107                      | 0.96 %  |
| 25-29 years                   | 32 596               | 19 289                                        | 59.2 %  | 245                      | 0.75 %  |
| 30-34 years                   | 38 873               | 23 364                                        | 60.1 %  | 226                      | 0.58 %  |
| ≥35 years                     | 17 766               | 10 564                                        | 59.5 %  | 119                      | 0.67 %  |
| <b>Paternal age</b>           |                      |                                               |         |                          |         |
| <25 years                     | 4843                 | 2209                                          | 45.6 %  | 36                       | 0.74 %  |
| 25-29 years                   | 22 317               | 12 915                                        | 57.9 %  | 191                      | 0.86 %  |
| 30-34 years                   | 38 665               | 23 114                                        | 59.8 %  | 238                      | 0.62 %  |
| ≥35 years                     | 23 983               | 14 111                                        | 58.8 %  | 146                      | 0.61 %  |
| ≥40 years                     | 10 110               | 5946                                          | 58.8 %  | 82                       | 0.81 %  |
| Missing information           | 446                  | 225                                           | 50.4 %  | 4                        | 0.90 %  |
| <b>Maternal parity</b>        |                      |                                               |         |                          |         |
| 0 children                    | 44 851               | 27 826                                        | 62.0 %  | 386                      | 0.86 %  |
| 1 child                       | 35 826               | 20 078                                        | 56.0 %  | 188                      | 0.52 %  |
| ≥2 children                   | 19 525               | 10 529                                        | 53.9 %  | 123                      | 0.63 %  |
| Missing information           | 162                  | 87                                            | 53.7 %  | 0                        | 0       |
| <b>Maternal living status</b> |                      |                                               |         |                          |         |
| Married/cohabitating          | 92 955               | 56 240                                        | 60.5 %  | 621                      | 0.67 %  |
| Single/other                  | 3132                 | 1576                                          | 50.3 %  | 35                       | 1.12 %  |
| Missing information           | 4277                 | 704                                           | 16.5 %  | 41                       | 0.96 %  |

Includes MoB participants who received the 36-month questionnaire (n=100 364 including 697 ASD cases).

ASD = Autism spectrum disorder.
